# Supplementary material
Source: MDPI journal article supplement (https://www.mdpi.com/2073-4344/13/10/1347)
Supplement: s1 [file s1]

# Comparative evaluation of the asymmetric synthesis of (S)-norlaudanosoline in a two-step biocatalytic reaction with whole *Escherichia coli* cells in batch and continuous flow catalysis

Adson Hagen Arnold <sup>1</sup> and Kathrin Castiglione <sup>1\*</sup>

<sup>1</sup> Institute of Bioprocess Engineering, Friedrich-Alexander-Universität Erlangen-Nürnberg, Paul-Gordan-Str. 3, Erlangen, 91052, Germany

\* Correspondence: kathrin.castiglione@fau.de

|     |                                                                       |   |
|-----|-----------------------------------------------------------------------|---|
| 1.  | Expression of TAm and NCS in whole <i>Escherichia coli</i> cells..... | 2 |
| 1.1 | Expression of TAm.....                                                | 2 |
| 1.2 | Expression of NCS .....                                               | 2 |
| 2.  | Biocatalyst stability .....                                           | 3 |
| 3.  | Chiral HPLC analysis .....                                            | 4 |
| 3.1 | (S)-NLS: chemical standard .....                                      | 4 |
| 3.2 | rac-NLS: chemical standard .....                                      | 4 |

# 1. Expression of TAm and NCS in whole *Escherichia coli* cells

## 1.1 Expression of TAm

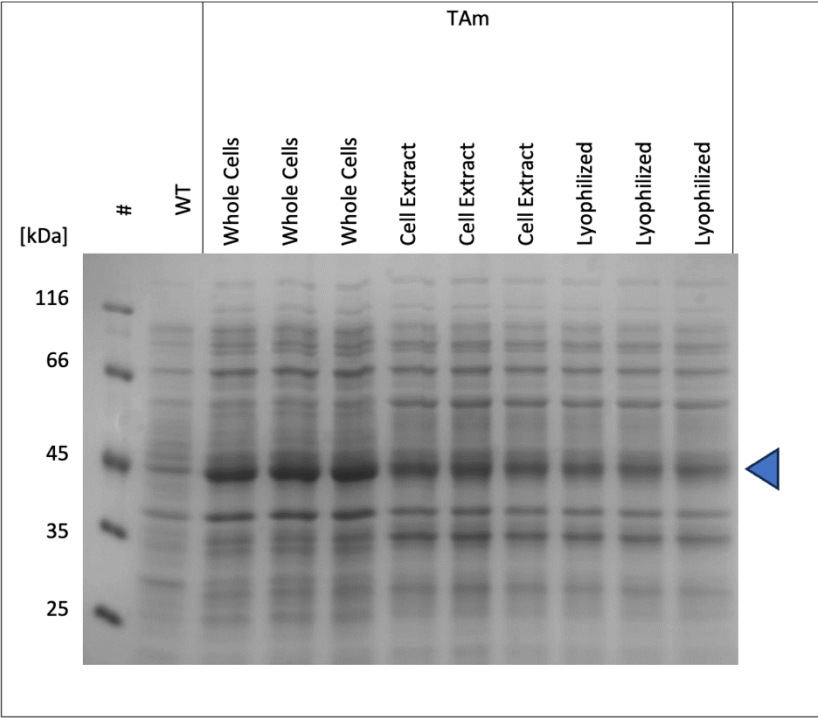

Figure S1: Analysis of the TAm expression in *E. coli* cells using SDS-PAGE (15 % gel). 1: left to right: pEqGold Protein Marker 1, wild type, 3x CV\_TAm in whole cells, 3x CV\_TAm in cell extract, 3x CV\_TAm in lyophilized cells. The overexpressed TAm is marked by a blue arrow.

## 1.2 Expression of NCS

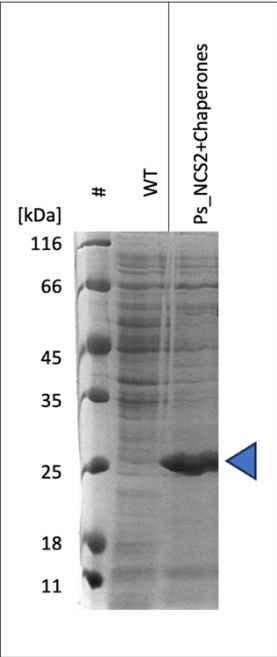

Figure S2: Analysis of the NCS expression in *E. coli* cells using SDS-PAGE (18 % gel). SDS-PAGE 2: left to right: pEqGold Protein Marker 1, wild type cells without plasmid, cells transformed with a plasmid coding for Ps\_NCS2 and plasmid pG-Tf2 bearing the genes *groES-groEL-tig*. The overexpressed Ps\_NCS2 is marked by a blue arrow. The chaperones GroEL (around 60 kDa), GroES (around 10 kDa) and trigger factor (around 56 kDa) are not visible.

## 2. Biocatalyst stability

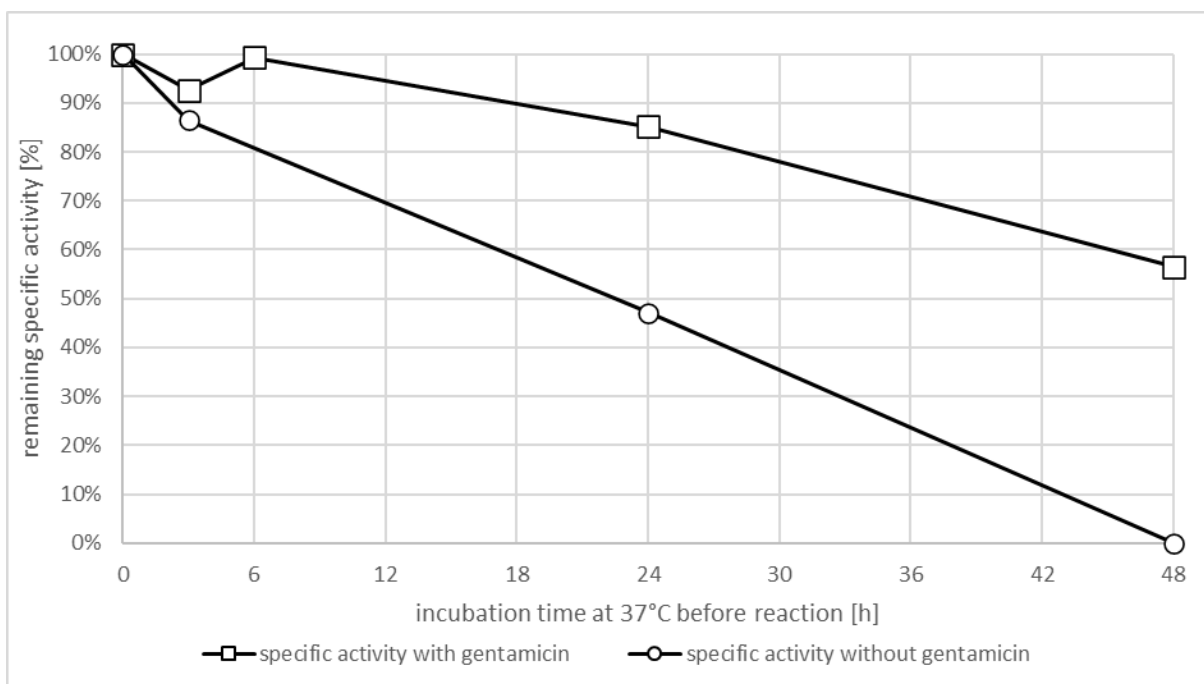

Figure S3: Time course of NCS activity in whole cells incubated at 37°C before substrate addition. Squares: Activity after incubation with 25  $\mu\text{g mL}^{-1}$  gentamicin during incubation and reaction. Circles: Activity without gentamicin during incubation and reaction.

Reaction conditions: 50 mM HEPES (pH 7.4), 50 mM dopamine, 50 mM pyruvate, 4  $\text{g L}^{-1}$  ascorbate. 3 h; 37 °C. The activity determined by chiral HPLC.

### 3. Chiral HPLC analysis

#### 3.1 (S)-NLS: chemical standard

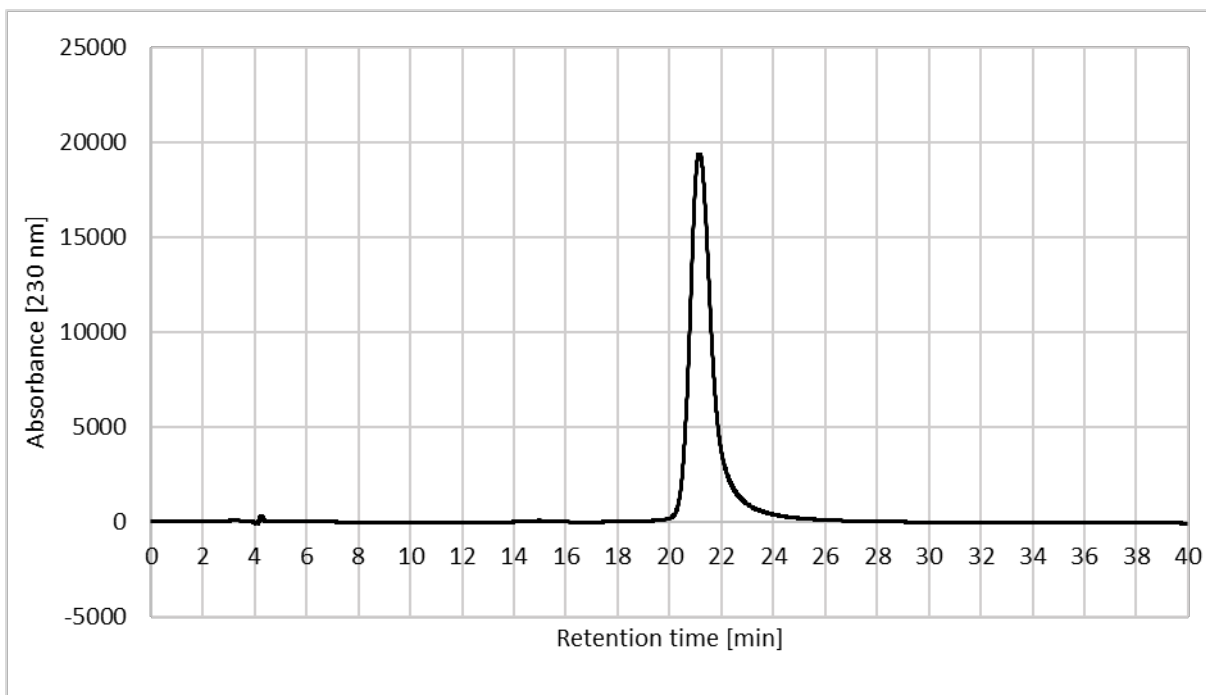

Figure S4: Chromatogram of (S)-norlaudanosoline analytics. An Astec Chirobiotic T column (25 cm) was used with 20:20:60 MeOH:ACN:25 mM phosphate buffer (pH 4.2) as mobile phase at a flow rate of 0.2 mL min<sup>-1</sup> at 20°C.

#### 3.2 rac-NLS: chemical standard

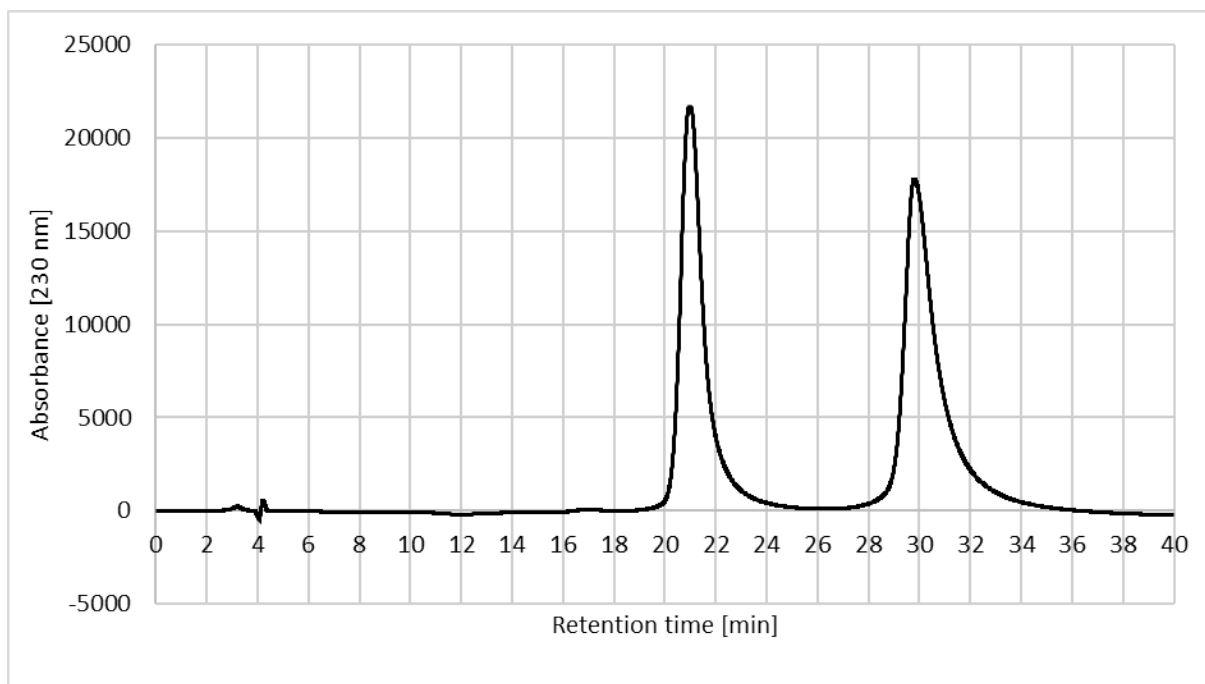

Figure S5: Chromatogram of rac-norlaudanosoline analytics. An Astec Chirobiotic T column (25 cm) was used with 20:20:60 MeOH:ACN:25 mM phosphate buffer (pH 4.2) as mobile phase at a flow rate of 0.2 mL min<sup>-1</sup> at 20°C.
